# Supplementary material for: The Experiences of Informal Carers during the COVID-19 Pandemic: A Qualitative Systematic Review
Source: MDPI journal article supplement (doi:10.3390/ijerph192013455), 2022-10-18
Supplement: s1 [file s1]

- Emotional distress (19)
- Focus on Vigilance and safety (21)
- Threatened relationships (carer/person) (22)
- Heightened sense of threat, fear and vulnerability (24)
- Safety and trust (24)
- Increased fears (27)
- Putting oneself in danger (28)
- Fear of infect, death, future (31)
- Fear and anxiety (32)

- Changes in caregiving responsibilities (19/21)
- Reduced care services / support (21/22/23)
- Increased workload and strain (22)
- Threats to wellbeing (23)
- Increased responsibility (24)
- Practical difficulties with care and routines (25)
- Managing behavioural symptoms (26)
- Managing multiple needs (26)
- Reduced in person care (27)
- Frustration (28)
- Adherence to restrictions in wider society (28)
- Loss of therapeutic setting (29)
- Disruptions to healthcare and support services (30)
- Increased caregiver burden (28/30)
- Access to services – location-dependent (32)

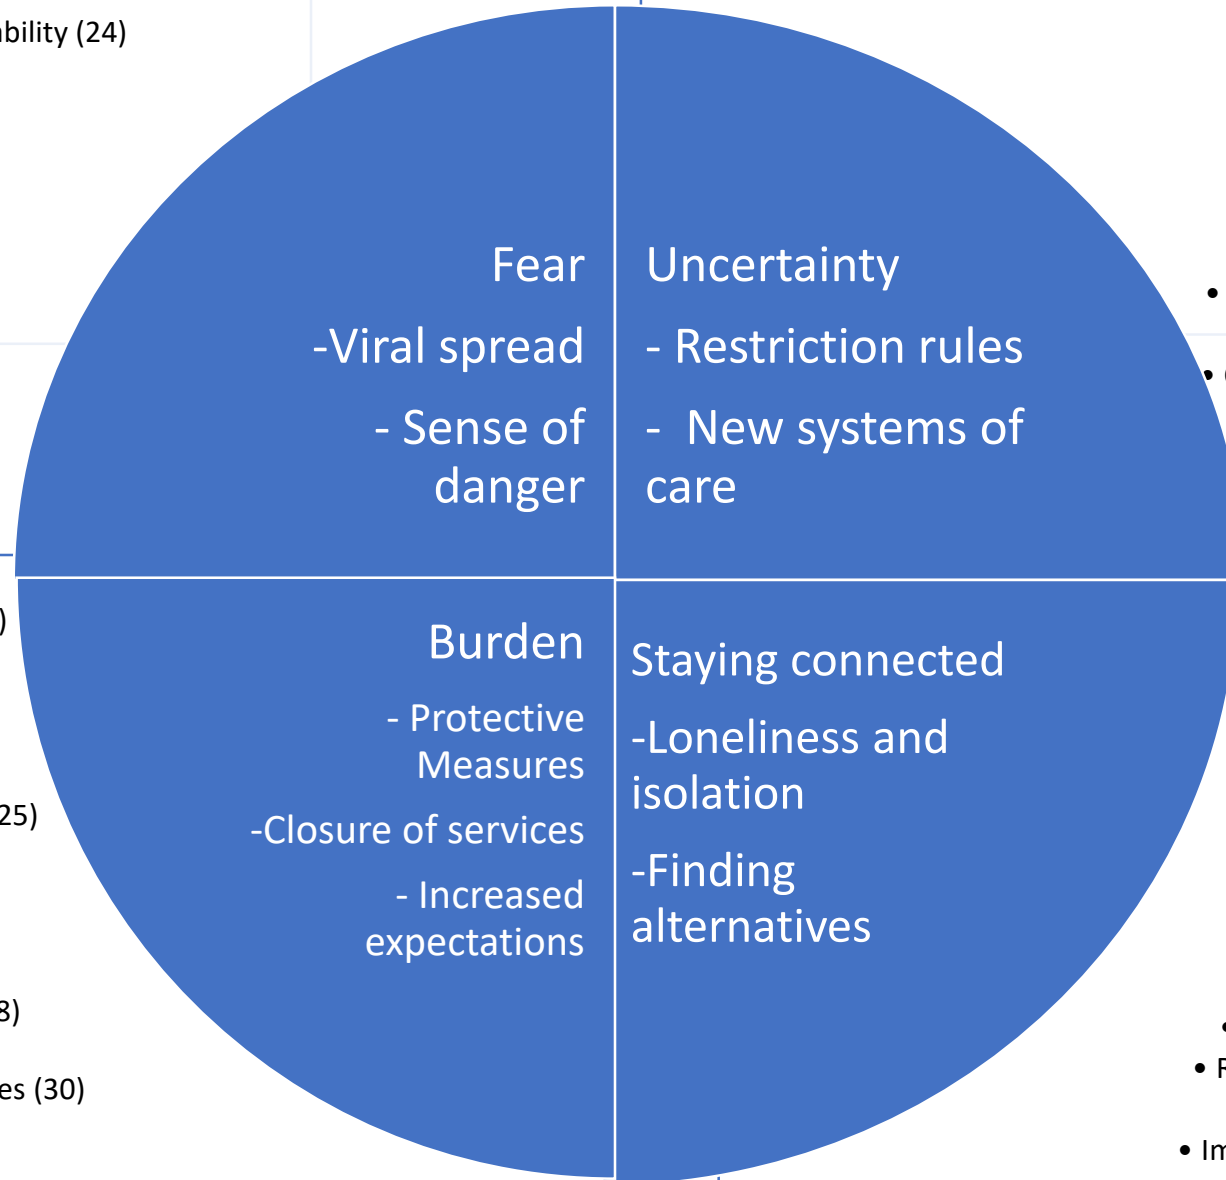

- Care reorganisation (23)
- Uncertainty, anxiety (23)
- Threats to psychological wellbeing (22)
  - Disruptions to processes (24)
  - Emotional stress (25)
  - Changes to routines (26)
- Uncertainty related stress (27)
- Confusion and limited comprehension (28)
  - Inequities in access (29/32)
- Increased symptoms / psychosocial needs (30)
  - Thoughts about life and future (31)
- Changes to food shopping/eating patterns (32)
- Coping strategies to deal with lockdown (19)
  - Support networks (20)
  - Lifestyle factors (20)
  - Adaptions (20/32)
- Limited social and physical contacts (20)
  - New ways of connecting (21)
- Social isolation (23/27/29/32)
  - Remote contacts (23)
- Difficulties reaching for help (25)
- Enhanced family communication (27)
- Remote access less likely to identify risks (29)
- Remote care – less shared decision making (29)
  - Telecommunication limitations (20)
- Impact on social behaviours and technology (31)
